# Supplementary material
Source: publisher figshare collection journal article supplement (https://frontiersin.figshare.com/ndownloader/files/32030822)

A.

IgM (anti-HK *Sp*)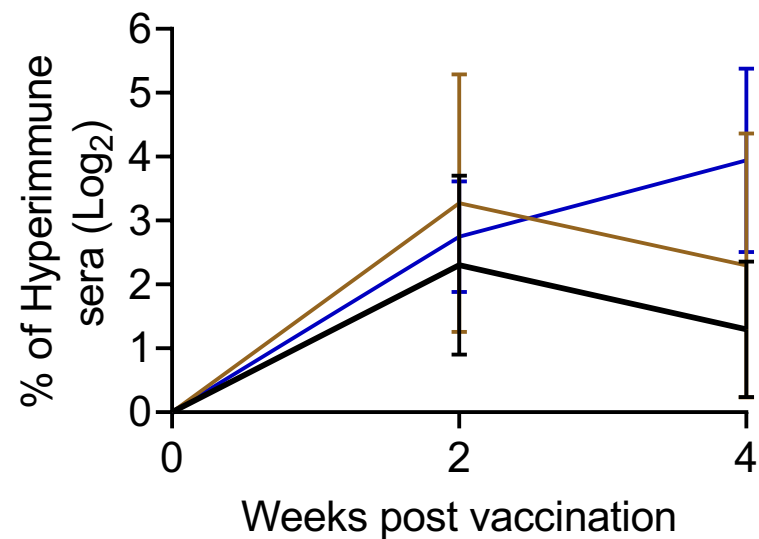

B.

IgG (anti-HK *Sp*)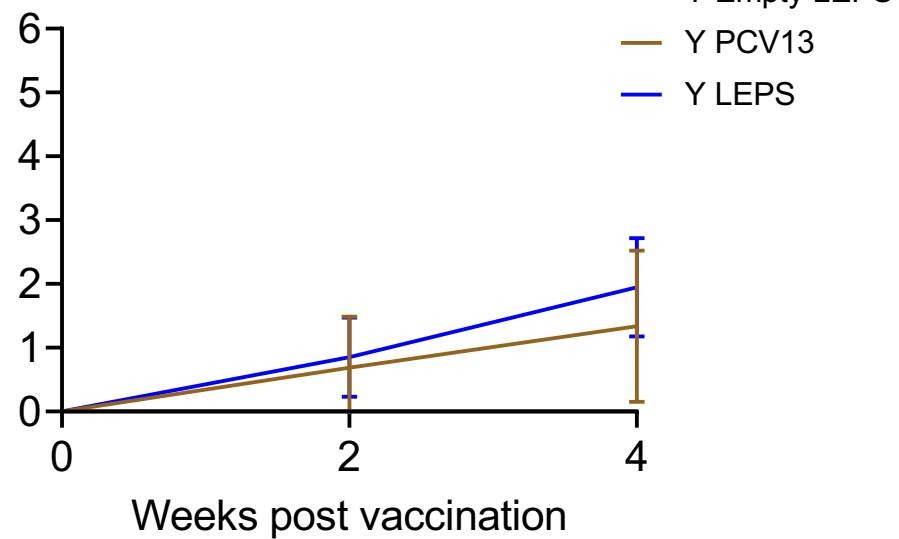

C.

IgM (anti-HK *Sp*)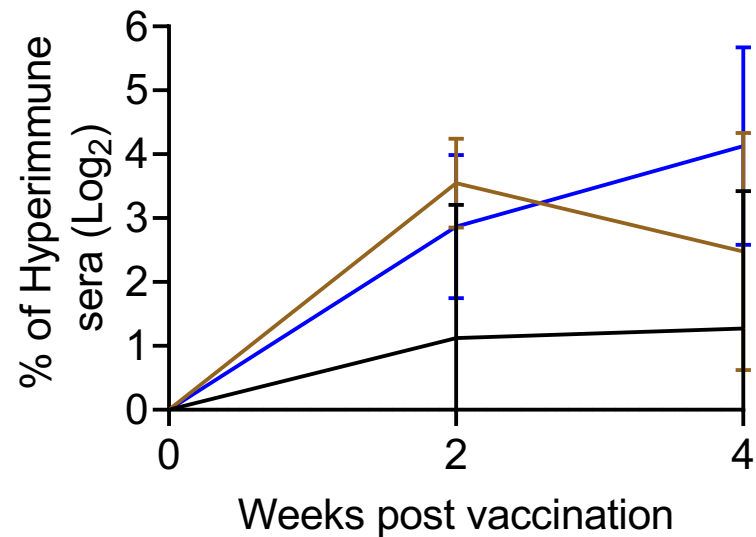

D.

IgG (anti-HK *Sp*)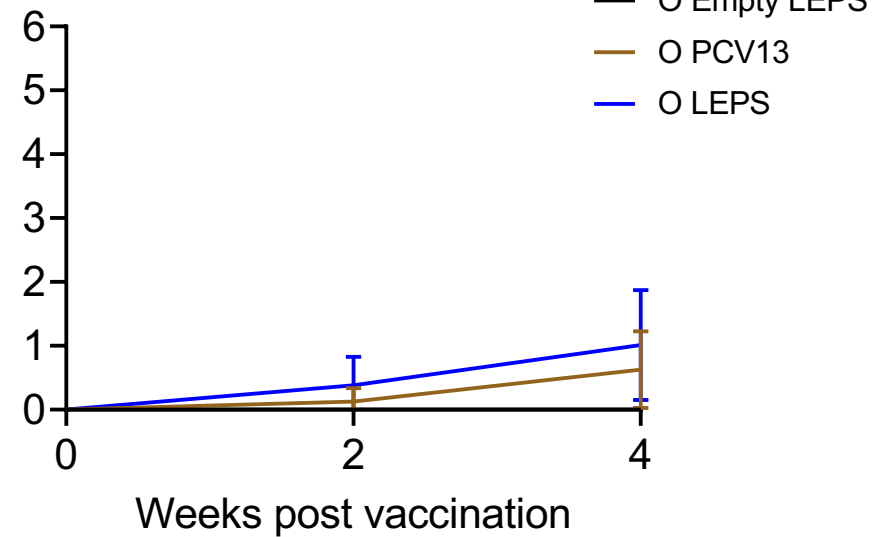

Supplement: Supplementary file [file 32030822]
